# Supplementary material for: Transcriptional subtypes on immune microenvironment and predicting postoperative recurrence and metastasis in human pheochromocytoma and paraganglioma
Source: eLife. 2025 Dec 16;14:RP107108. doi: 10.7554/eLife.107108 (PMC12707812; doi:10.7554/eLife.107108)
Supplement: Figure 2—source data 1. [file elife-107108-fig2-data1.xlsx]

## Sheet: Sheet1
Sample	Group	Tumor_tissue_site	PCPG_Driver_Gene	Variant_Classification	Mutation_Status
TCGA-P8-A5KD	Cluster1	Adrenal gland	HRAS	Missense_Mutation	Somatic
TCGA-PR-A5PG	Cluster1	Adrenal gland	HRAS	Missense_Mutation	Somatic
TCGA-QR-A6GS	Cluster1	Adrenal gland	NF1	Splice_Site	Somatic
TCGA-QR-A6GW	Cluster1	Adrenal gland	HRAS	Missense_Mutation	Somatic
TCGA-QR-A6H4	Cluster3	Adrenal gland	HRAS	Missense_Mutation	Somatic
TCGA-QR-A6H5	Cluster1	Adrenal gland	VHL	Missense_Mutation	Somatic
TCGA-QR-A702	Cluster3	Extra-adrenal Site	NF1	Frame_Shift_Ins	Somatic
TCGA-QR-A70M	Cluster3	Adrenal gland	HRAS	Missense_Mutation	Somatic
TCGA-QR-A70N	Cluster1	Adrenal gland	VHL	Missense_Mutation	Somatic
TCGA-QR-A70U	Cluster1	Adrenal gland	FGFR1	Missense_Mutation	Somatic
TCGA-QR-A70V	Cluster3	Adrenal gland	NF1	Frame_Shift_Del	Somatic
TCGA-QR-A70W	Cluster2	Adrenal gland	HRAS	Missense_Mutation	Somatic
TCGA-QR-A7IN	Cluster3	Adrenal gland	EPAS1	Missense_Mutation	Somatic
TCGA-QT-A5XK	Cluster3	Adrenal gland	RET	Missense_Mutation	Somatic
TCGA-QT-A5XL	Cluster1	Adrenal gland	EPAS1	Missense_Mutation	Somatic
TCGA-QT-A5XM	Cluster1	Adrenal gland	RET	Missense_Mutation	Somatic
TCGA-QT-A5XO	Cluster1	Adrenal gland	EGLN1	Missense_Mutation	Somatic
TCGA-QT-A7U0	Cluster3	Extra-adrenal Site	EPAS1	Missense_Mutation	Somatic
TCGA-RT-A6YA	Cluster1	Adrenal gland	NF1	Missense_Mutation	Somatic
TCGA-RW-A67X	Cluster1	Adrenal gland	VHL	In_Frame_Ins	Somatic
TCGA-RW-A67Y	Cluster1	Adrenal gland	NF1	Nonsense_Mutation	Somatic
TCGA-RW-A684	Cluster1	Adrenal gland	FGFR1	Missense_Mutation	Somatic
TCGA-RW-A685	Cluster1	Adrenal gland	NF1	Missense_Mutation	Somatic
TCGA-RW-A688	Cluster1	Adrenal gland	NF1	Frame_Shift_Del	Somatic
TCGA-RW-A689	Cluster1	Adrenal gland	NF1	Frame_Shift_Del	Somatic
TCGA-RW-A68D	Cluster1	Adrenal gland	EPAS1	Missense_Mutation	Somatic
TCGA-RW-A7D0	Cluster1	Adrenal gland	NF1	Nonsense_Mutation	Somatic
TCGA-RW-A8AZ	Cluster3	Adrenal gland	MAML3	Missense_Mutation	Somatic
TCGA-S7-A7WL	Cluster3	Adrenal gland	NF1	Frame_Shift_Del	Somatic
TCGA-S7-A7WM	Cluster3	Adrenal gland	SDHA	Missense_Mutation	Somatic
TCGA-S7-A7WN	Cluster1	Adrenal gland	HRAS	Missense_Mutation	Somatic
TCGA-S7-A7WR	Cluster1	Adrenal gland	HRAS	Missense_Mutation	Somatic
TCGA-S7-A7X0	Cluster1	Extra-adrenal Site	EPAS1	Missense_Mutation	Somatic
TCGA-SP-A6QF	Cluster1	Adrenal gland	HRAS	Missense_Mutation	Somatic
TCGA-SP-A6QJ	Cluster1	Adrenal gland	HRAS	Missense_Mutation	Somatic
TCGA-SP-A6QK	Cluster2	Adrenal gland	RET	Missense_Mutation	Somatic
TCGA-SQ-A6I6	Cluster1	Adrenal gland	NF1	Frame_Shift_Ins	Somatic
TCGA-SR-A6MQ	Cluster1	Extra-adrenal Site	HRAS	Missense_Mutation	Somatic
TCGA-SR-A6MV	Cluster2	Extra-adrenal Site	EPAS1	Missense_Mutation	Somatic
TCGA-SR-A6MY	Cluster1	Adrenal gland	HRAS	Missense_Mutation	Somatic
TCGA-TT-A6YJ	Cluster1	Adrenal gland	NF1	Splice_Site	Somatic
TCGA-W2-A7HC	Cluster1	Adrenal gland	HRAS	Missense_Mutation	Somatic
TCGA-W2-A7HD	Cluster1	Adrenal gland	HRAS	Missense_Mutation	Somatic
TCGA-WB-A80N	Cluster1	Adrenal gland	HRAS	Missense_Mutation	Somatic
TCGA-WB-A80O	Cluster1	Adrenal gland	HRAS	Missense_Mutation	Somatic
TCGA-WB-A80V	Cluster2	Adrenal gland	RET	Missense_Mutation	Somatic
TCGA-WB-A814	Cluster1	Extra-adrenal Site	EPAS1	Missense_Mutation	Somatic
TCGA-WB-A818	Cluster1	Adrenal gland	NF1	Frame_Shift_Del	Somatic
TCGA-WB-A819	Cluster1	Adrenal gland	RET	Missense_Mutation	Somatic
TCGA-WB-A81H	Cluster3	Adrenal gland	NF1	Frame_Shift_Del	Somatic
TCGA-WB-A81P	Cluster1	Adrenal gland	NF1	Frame_Shift_Del	Somatic
TCGA-WB-A81R	Cluster3	Adrenal gland	HRAS	Missense_Mutation	Somatic
TCGA-WB-A81T	Cluster1	Adrenal gland	HRAS	Missense_Mutation	Somatic
TCGA-WB-A81V	Cluster3	Adrenal gland	NF1	Frame_Shift_Del	Somatic
TCGA-WB-A821	Cluster1	Adrenal gland	EPAS1	Missense_Mutation	Somatic
E019	Cluster1	Extra-adrenal Site	SDHB	Missense_Mutation	Germline
E024	Cluster1	Adrenal gland	VHL	Missense_Mutation	Germline
E041	Cluster1	Adrenal gland	VHL	Missense_Mutation	Somatic
E042	Cluster1	Adrenal gland	VHL	Missense_Mutation	Germline
E196	Cluster1	Extra-adrenal Site	SDHB	Missense_Mutation	Germline
E205	Cluster1	Adrenal gland	EPAS1	Missense_Mutation	Somatic
E206	Cluster1	Adrenal gland	EPAS1	Missense_Mutation	Somatic
P018-PGL1	Cluster1	Extra-adrenal Site	SDHB	Missense_Mutation	Germline
P018-PGL3	Cluster1	Extra-adrenal Site	SDHB	Missense_Mutation	Germline
E008	Cluster2	Adrenal gland	MAML3	gene fusion	Somatic
E017	Cluster2	Adrenal gland	NF1	Frame_Shift_Del	Somatic
E018	Cluster2	Adrenal gland	RET	Missense_Mutation	Germline
E035	Cluster2	Adrenal gland	HRAS	Missense_Mutation	Somatic
E174	Cluster2	Adrenal gland	NF1	Missense_Mutation	Somatic
E208	Cluster2	Extra-adrenal Site	MAX	Missense_Mutation	Germline
E209	Cluster2	Adrenal gland	MAX	Missense_Mutation	Germline
E210	Cluster2	Extra-adrenal Site	FH	Splice_Site	Germline
E211	Cluster2	Adrenal gland	FH	Missense_Mutation	Germline
E235	Cluster2	Adrenal gland	TMEM127	Missense_Mutation	Somatic
E237	Cluster2	Adrenal gland	MAML3	gene fusion	Somatic
E236	Cluster2	Extra-adrenal Site	H3F3A	Missense_Mutation	Somatic
P010	Cluster2	Adrenal gland	RET	Missense_Mutation	Germline
E007	Cluster2	Adrenal gland	TMEM127	Missense_Mutation	Germline
E027	Cluster2	Adrenal gland	NF1	Frame_Shift_Del	Somatic
E214	Cluster3	Extra-adrenal Site	SDHD	Missense_Mutation	Germline
E025	Cluster3	Extra-adrenal Site	SDHA	Missense_Mutation	Germline
E216	Cluster3	Extra-adrenal Site	SDHD	Splice_Site	Germline
E213	Cluster3	Extra-adrenal Site	SDHD	Deletion	Germline
E215	Cluster3	Extra-adrenal Site	SDHD	Missense_Mutation	Germline
